# Supplementary material for: Thermal restructuring of silica-grafted –CrO2Cl and –VOCl2 species
Source: Royal Society of Chemistry journal article supplement (doi:10.1039/c3dt50843a), 2013-01-01
Supplement: c3dt50843a.pdf [file c3dt50843a.pdf]

# Thermal Restructuring of Silica-Grafted $-\text{CrO}_2\text{Cl}$ and $-\text{VOCl}_2$ Species

Philipp Mania,<sup>a</sup> Sabrina Conrad,<sup>a</sup> René Verel,<sup>a</sup> Ceri Hammond,<sup>a</sup> Ive Hermans\*<sup>a</sup>

<sup>a</sup> ETH Zurich, Department of Chemistry and Applied Biosciences, Zurich

## SUPPORTING INFORMATION

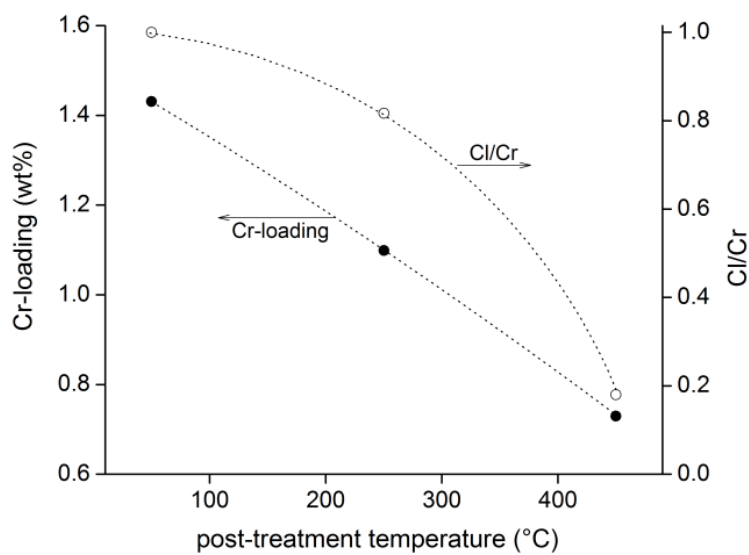

Figure 1. Decrease of the Cr-loading and the Cl/Cr ratio during thermal post-treatment.

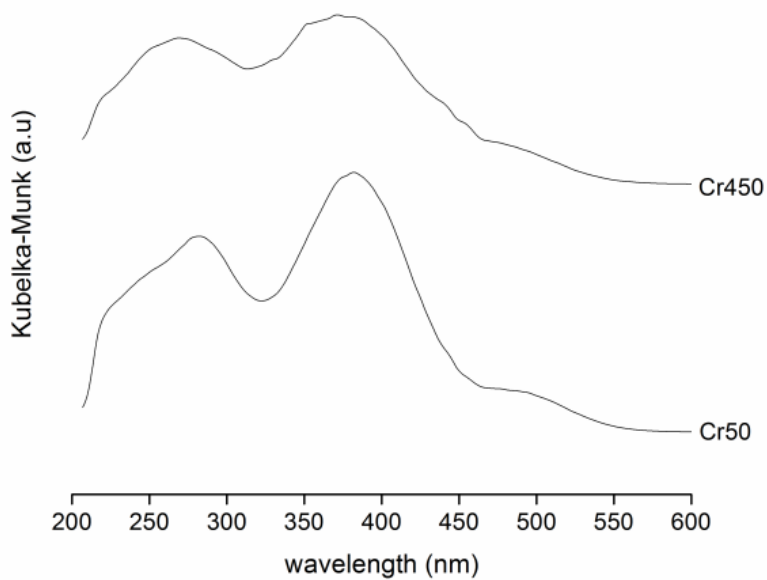

Figure 2. Diffuse Reflectance UV-Vis spectra of the Cr50 and Cr450 samples.

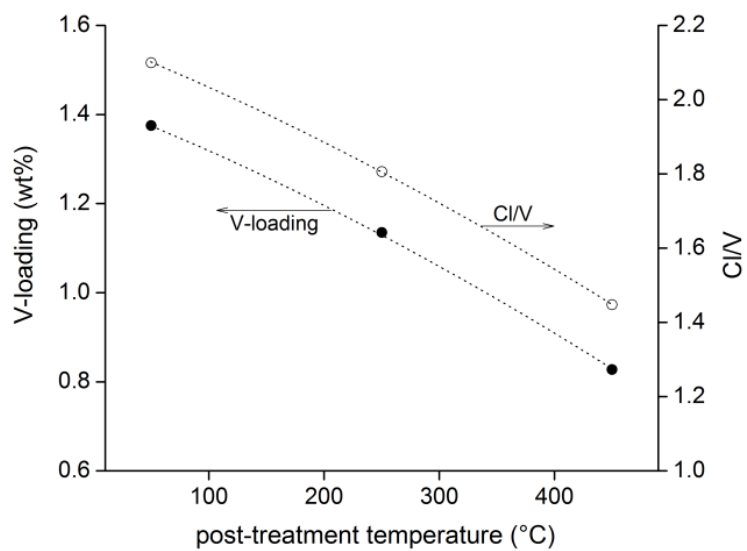

Figure 3. Decrease of the V-loading and the Cl/V ratio during thermal post-treatment.
